# Supplementary material for: Systematic Investigation of the Effect of Powerful Tianma Eucommia Capsule on Ischemic Stroke Using Network Pharmacology
Source: Evid Based Complement Alternat Med. 2021 Jun 4;2021:8897313. doi: 10.1155/2021/8897313 (PMC8203382; doi:10.1155/2021/8897313)
Supplement: Supplementary Materials — All tables and molecular docking control lines can be found in supplementary materials. [file 8897313.f1.zip]

Archive with 6 entries (6 files):
- 8897313.f1/supplement figures.docx
- 8897313.f1/Table 1.docx
- 8897313.f1/Table 2.docx
- 8897313.f1/Table 3.docx
- 8897313.f1/Table 4.docx
- 8897313.f1/Table 5.docx
